1 **Impact of universal masking in health care and community on SARS-CoV-2 spread**

2

3 Pletz MW<sup>1</sup>; Steiner A<sup>2</sup>; Kesselmeier M<sup>3</sup>, Löffler B<sup>4</sup>, Trommer S<sup>5</sup>, Weis S<sup>1,6</sup>, Maschmann J<sup>7</sup>,

4

Stallmach A<sup>8</sup>

5

6 1) Institute for Infectious Diseases and Infection Control, Jena University Hospital, Jena,

7

Germany

8

2) Department for Occupational Health, Jena University Hospital, Jena, Germany

9

3) Research Group Clinical Epidemiology, Center for Sepsis Control and Care (CSCC), Jena

10

University Hospital, Jena, Germany

11

4) Institute for Medical Microbiology, Jena University Hospital, Jena, Germany

12

5) Public Health Department, City of Jena

13

6) Department of Anesthesiology and Intensive Care Medicine, Jena University Hospital,

14

Jena, Germany

15

7) Medical Executive Board, Jena University Hospital, Jena, Germany

16

8) Department of Internal Medicine IV (Gastroenterology, Hepatology and Infectious

17

Diseases), Jena University Hospital, Jena, Germany

18

19 Corresponding author:

20

21 *Mathias W. Pletz, MD, Full Professor and Chair*  
22 *Institute for Infectious Diseases and Infection Control*  
23 *Jena University Hospital / Friedrich-Schiller-University*  
24 *Am Klinikum 1*  
25 *07747 Jena*  
26 *Germany*

27

28 *Tel. +49-3641-932-4650 oder -4794 (secretary)*

29 *Email: mathias.pletz@med.uni.jena.de*

30 *Fax. +49-3641-932-4652*

31

32 **Abstract**

33 Universal masking the health care setting and in the community to contain the spread of  
34 SARS-CoV-2 has been recently recommended by the WHO, but supporting data are rare.  
35 The City of Jena was the first community in Germany to issue an order on mandatory public  
36 masking. Here, we report the development of the number of novel infections in our hospital  
37 and in the city of Jena after implementation of universal masking in our hospital and the city.

38

39 **Introduction**

40 There are only a few studies on universal masking during the flu season in hospitals  
41 (Esposito et al. 2020), and, to the best of our knowledge, there are no studies investigating  
42 the efficacy of universal masking in healthy individuals to prevent SARS-CoV-2  
43 transmissions. At least, for seasonal human corona virus infection, it was shown that exhaled  
44 droplets with a diameter of  $\leq 5 \mu\text{m}$  containing viral particles can completely be withheld by  
45 surgical masks when worn by an infected person (Leung et al. 2020). Arguments against  
46 universal masking include a global supply shortage of medical masks, the insufficient  
47 filtration of alternative cloth masks compared to medical masks (MacIntyre et al. 2015), a  
48 false sense of protection by wearing a mask that may result in failing to maintain physical  
49 distance from others, and the risk imposed by incorrect usage of masks by non-trained  
50 carriers, e.g. transmitting pathogens from contaminated hands to the mask. Here, we report  
51 effects of universal masking that were observed after implementation of (i) mandatory  
52 universal masking in the Jena University Hospital (JUH) and (ii) of mandatory community  
53 masking in the city of Jena.

54

55 **Impact of hospital-wide universal masking**

56 The JUH is a tertiary academic hospital with about 1,400 beds and 5,600 employees  
57 providing care for about 53,000 inpatients per year. The first detected COVID-19 case in  
58 Jena was a physician returning from Austria. Upon his return, he immediately reported to the  
59 hospital occupational health department, was tested and isolated at home on 11<sup>th</sup> March

60 2020. On 16<sup>th</sup> March, a nurse that had returned from skiing in Northern Italy became the  
61 source of the first nosocomial outbreak involving four patients and two health care workers  
62 (HCW). Consequently, extensive screening was conducted on 1,311 HCW – representing  
63 one third of the total work force in direct patient care- between 11<sup>th</sup> March and 12<sup>th</sup> May  
64 resulting in 31 positive cases until 19<sup>th</sup> March, approximately one week after the first  
65 confirmed case (**Figure 1**). As a consequence, mandatory masking for all personnel involved  
66 in patient care was implemented on 20<sup>th</sup> March. Continued routine staff screening revealed  
67 only four HCWs tested positive between 20<sup>th</sup> March and 12<sup>th</sup> May. This corresponds to a  
68 substantial drop in the rate of new infections among HCWs from 10.1% (31 of 306 screened  
69 HCW in this period) before to 0.4% (4 of 1,005 HCW screened in this period) after  
70 implementation of universal masking. In addition, a strict containment system was introduced  
71 on 5<sup>th</sup> April, which included placing all patients in single rooms upon admission and SARS-  
72 CoV-2 screening regardless of their admitting chief complaint. Thereafter, HCW screening  
73 did not reveal any further positive case.

74

#### 75 **Impact of community-wide universal masking**

76 Jena is the second largest city in Thuringia, Germany, with approximately 111,400  
77 inhabitants. Despite thorough contact tracing and isolation of confirmed COVID-19 positive  
78 cases by the authorities, a rapid increase in numbers was observed after patient zero  
79 (**Figure 1**). The governmental containment (closing of stores, schools, kindergartens,  
80 churches etc.) together with social distancing measures was strictly implemented on 20<sup>th</sup>  
81 March in Jena and four days later in the entire Federal State of Thuringia. As novel infections  
82 continued to occur, Jena authorities were the first in Germany to introduce universal  
83 community-wide masking, *i.e.* mandatory covering of the mouth and nose in public buildings  
84 and public transport accepting also cloth masks or scarfs. On 24<sup>th</sup> April, a state-wide  
85 recommendation for community-wide masking in combination with first relaxations of the  
86 strict lockdown was issued.

87 We also assessed the effectiveness of mandatory community-wide masking in Jena in  
88 comparison with the nearby city of Erfurt (**Figure 1**). Both cities exhibit a similar university as  
89 well as socioeconomic structure. Erfurt introduced masking four weeks after Jena,  
90 simultaneously with the first relaxation of the lockdown measures.

91 As shown in **Figure 1**, there were no new COVID-19 cases in Jena five days after  
92 implementation, which is in line with the average incubation time of SARS-CoV-2. While in  
93 Erfurt, COVID-19 continued to spread and only ceased after the same community-wide  
94 masking was imposed.

95 We are aware that mere association is not causation and that our conclusions are limited by  
96 the observational nature of the data. However, it is uncertain whether an ethically sound trial  
97 on the controversial issue of mandatory community-wide masking will ever be performed.  
98 Therefore, our observations support the notion to implement universal masking in both health  
99 care as well as community settings as considering the ensuing reduced infection-rates.  
100 Given the risk-benefit ratio, we consider universal masking combined with social distancing  
101 as a suitable measure to contain the spread of SARS-CoV-2.

102

103

104

#### 105 *Funding*

106 MP was supported by a grant from the German Ministry of Education and Research (BMBF  
107 No. KI1501). MK was supported by the Integrated Research and Treatment Center – Center  
108 for Sepsis Control and Care (CSCC) at the Jena University Hospital, funded by the German  
109 Ministry of Education and Research (BMBF No. 01EO1502).

#### 110 *Conflicts of interest*

111 *The authors do not report any conflict of interest.*

112 **FIGURE**

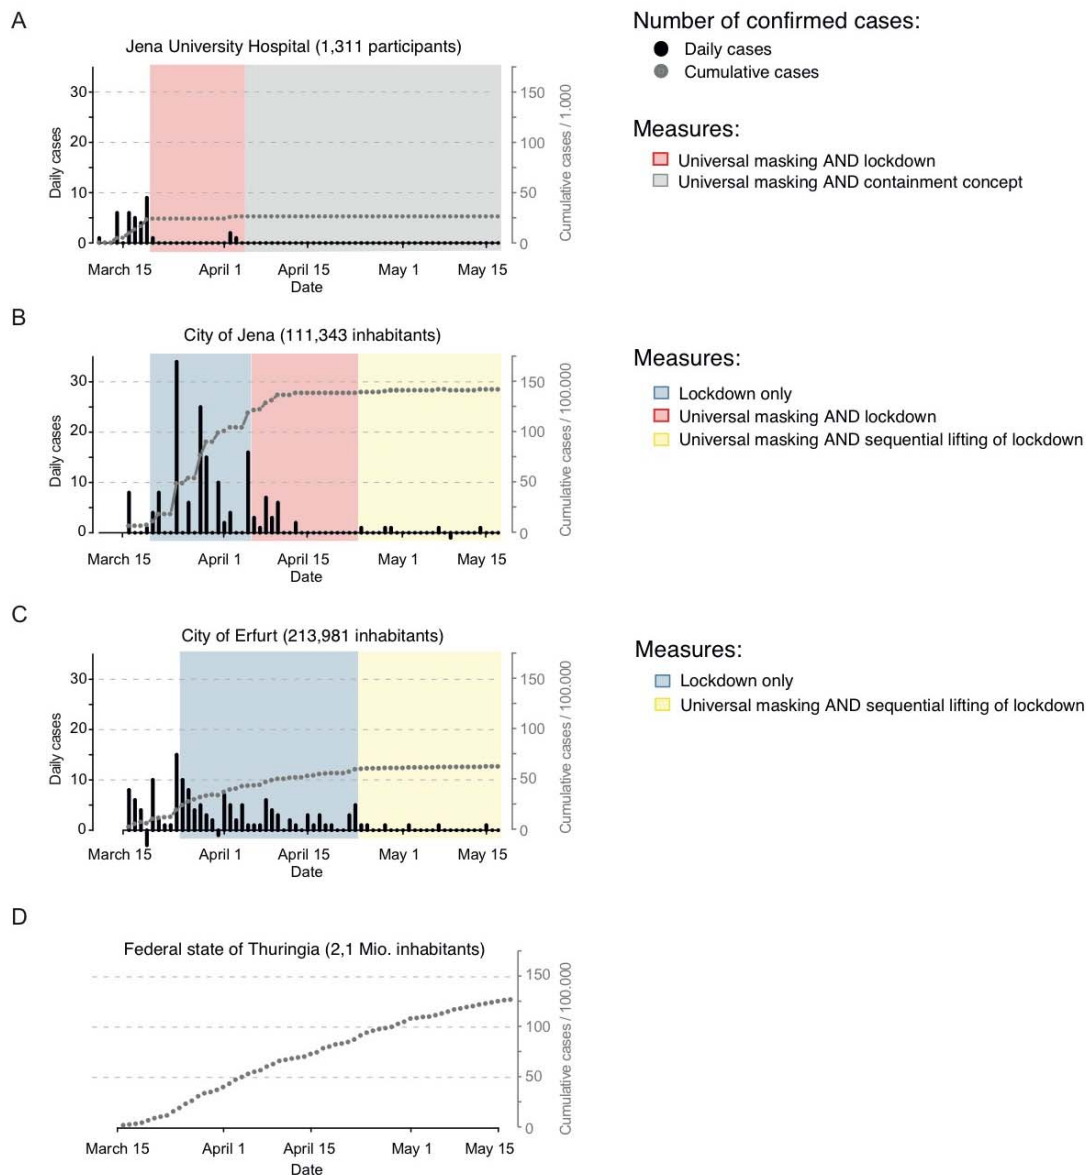

113

114 **Figure 1:** Daily reported newly confirmed cases of SARS-CoV-2 infection and **A)**  
 115 corresponding cumulative cases per 1,000 health care workers (HCW) of Jena University  
 116 Hospital (JUH, 1,500 beds) as well as per 100,000 inhabitants of the Thuringian cities **B)**  
 117 Jena and **C)** Erfurt. All reported cases comprise only the first SARS-CoV-2 test results. Results of  
 118 multiple testing are excluded because all infected subjects were reported by full name and  
 119 address to the respective Public Health Departments. **D)** For comparison, the cumulative  
 120 number per 100,000 inhabitants in the State of Thuringia is provided. Implemented measures  
 121 are color-coded.

122 Of note, “negative” bars for daily reported novel infections in Jena and Erfurt are explained  
 123 by re-classification of individual COVID-19 cases as non-COVID-19 after quality control of  
 124 the respective data and laboratory reports by the State Health Department of Thuringia. The  
 125 Population was taken from the Thuringian State Office of Statistics (31<sup>st</sup> December 2019).  
 126

127

128 **References**

129

130 Esposito, S., Principi, N., Leung, C.C. and Migliori, G.B. 2020. Universal use of face masks  
131 for success against COVID-19: evidence and implications for prevention policies. *Europ*  
132 *Respir J Apr 29; 2001260.*

133

134 Feng, S., Shen, C., Xia, N., Song, W., Fan, M. and Cowling, B.J. 2020. Rational use of face  
135 masks in the COVID-19 pandemic. *Lancet Resp. Med* 8(5), pp. 434–436.

136

137 Leung, N.H.L., Chu, D.K.W., Shiu, E.Y.C., Chan, K.-H., McDevitt, J.J., Hau, B.J.P., Yen, H.-  
138 L., Li, Y., Ip, D.K.M., Peiris, J.S.M., Seto, W.-H., Leung, G.M., Milton, D.K. and Cowling, B.J.  
139 2020. Respiratory virus shedding in exhaled breath and efficacy of face masks. *Nat Med* 26  
140 85): 676-680.

141

142 MacIntyre, C.R., Seale, H., Dung, T.C., Hien, N.T., Nga, P.T., Chughtai, A.A., Rahman, B.,  
143 Dwyer, D.E. and Wang, Q. 2015. A cluster randomised trial of cloth masks compared with  
144 medical masks in healthcare workers. *BMJ Open* 5(4), p. e006577.

145
